# Supplementary material
Source: publisher figshare collection journal article supplement (https://acs.figshare.com/ndownloader/files/6574749)
Supplement: Supplementary file 1 [file 6574749]

## Supporting information for

### Persistent type-II multiferroicity in nanostructured MnWO<sub>4</sub> ceramics

Pascaline Patureau<sup>a</sup>, Rémi Dessapt<sup>a</sup>, Philippe Deniard<sup>a</sup>, U-Chan Chung<sup>b,c</sup>, Dominique Michau<sup>b,c</sup>, Michaël Josse<sup>b,c</sup>, Christophe Payen<sup>a,\*</sup>, and Mario Maglione<sup>b,c,\*</sup>

<sup>a</sup> Institut des Matériaux Jean Rouxel (IMN), UMR6502, Université de Nantes, CNRS, BP 32229, 44322 Nantes cedex 3, France

<sup>b</sup> CNRS, ICMCB, UPR 9048, F-33600 Pessac, France

<sup>c</sup> Univ. Bordeaux, ICMCB, UPR 9048, F-33600 Pessac, France

### Characterization methods

Laboratory powder X-ray diffraction. X-ray diffraction (XRD) patterns were collected at room temperature on a Bruker D8 Advance instrument using monochromatic CuK-L<sub>3</sub> ( $\lambda = 1.540598 \text{ \AA}$ ) X-rays and a LynxEye detector. Le Bail and Rietveld analyses of the XRD data were performed using JANA 2006 [Petricek, V.; Dusek, M.; Palatinus, L. Crystallographic Computing System JANA2006: General Features. Z. Für Krist. 2014, 229 (5), 345–352.] and the Cheary-Coelho fundamental approach for XRD profile parameters [Cheary, R. W.; Coelho, J. Appl. Crystallogr. 1998, 31 (6), 851–861 ; J. Appl. Crystallogr. 1998, 31 (6), 862–868.].

Magnetic susceptibility. A Quantum Design MPMS-XL7 equipped with an Evercool dewar was used to collect temperature-dependent DC and AC magnetization data. Zero field cooled (ZFC) and field cooled (FC) DC magnetization measurements were taken from 2 to 300 K in an applied field of  $\mu_0 H = 0.1 \text{ T}$ . Data were corrected for the diamagnetism of the sample holder as well as for core diamagnetism using Pascal's constants [Bain, G. A.; Berry, J. Chem. Educ. 2008, 85 (4), 532.].

Dielectric permittivity. Dielectric measurements were performed on dense pellets ( $\approx 6 \text{ mm}$  diameter,  $\approx 1 \text{ mm}$  thick) using an HP4194a impedance bridge. Samples were loaded into a Quantum Design Physical Properties Measurement System (PPMS). Measurements were taken in the frequency ( $f$ ) range of 1 kHz– 400 kHz and in the temperature range of 5 - 20 K.

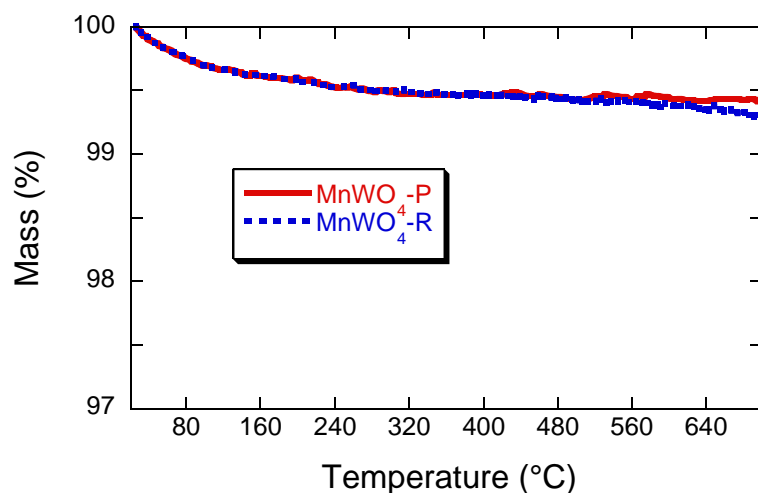

**Figure S1.** Thermogravimetric curves for  $\text{MnWO}_4$  nanopowders in flowing air. The small weight loss ( $\approx 0.5\%$ ) at around  $100^\circ\text{C}$  is due to evaporation of adsorbed water.

**Table S1.** Cell parameters of nanopowders and of nanostructured ceramics of  $\text{MnWO}_4$  as determined from Rietveld or Le Bail refinements of X-ray diffraction patterns recorded at room temperature. Refinements to the XRD data were made using the published  $P2/c$  structural model of  $\text{MnWO}_4$  [Lautenschläger, G.; Weitzel, H.; Vogt, T.; Hock, R.; Böhm, A.; Bonnet, M.; Fuess, H. Phys. Rev. B: Condens. Matter Mater. Phys. 1993, 48, 6087–6098.].

|                                   | $a$ (Å)  | $b$ (Å)  | $c$ (Å)  | $\beta$ (°) |
|-----------------------------------|----------|----------|----------|-------------|
| $\text{MnWO}_4$ -P<br>nanopellets | 4.827(1) | 5.761(1) | 5.001(1) | 91.16(2)    |
| $\text{MnWO}_4$ -R<br>nanorods    | 4.826(2) | 5.758(4) | 4.996(1) | 91.19(1)    |
| Nanostructured<br>ceramic-P       | 4.830(1) | 5.760(1) | 5.000(1) | 91.18(1)    |
| Nanostructured<br>ceramic-R       | 4.829(1) | 5.758(2) | 5.000(1) | 91.21(3)    |

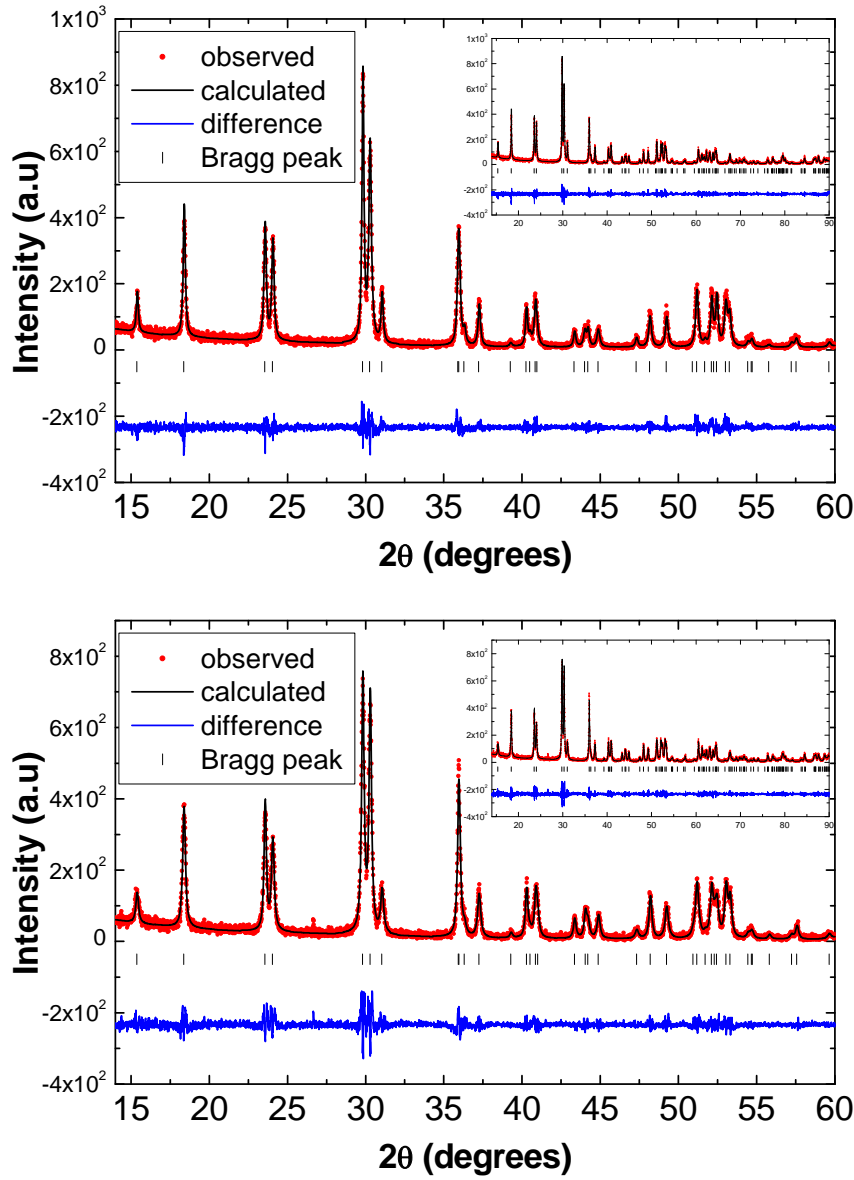

**Figure S2.** Final Rietveld refinement plots of the XRD data ( $\lambda = 1.540598 \text{ \AA}$ ) for nanopellets  $\text{MnWO}_4\text{-P}$  (upper graph) and nanorods  $\text{MnWO}_4\text{-R}$  (lower graph) powders. The Rietveld refinements were obtained using the published  $P2/c$  structural model of  $\text{MnWO}_4$  [Lautenschläger, G.; Weitzel, H.; Vogt, T.; Hock, R.; Böhm, A.; Bonnet, M.; Fuess, H. Phys. Rev. B: Condens. Matter Mater. Phys. 1993, 48, 6087–6098].

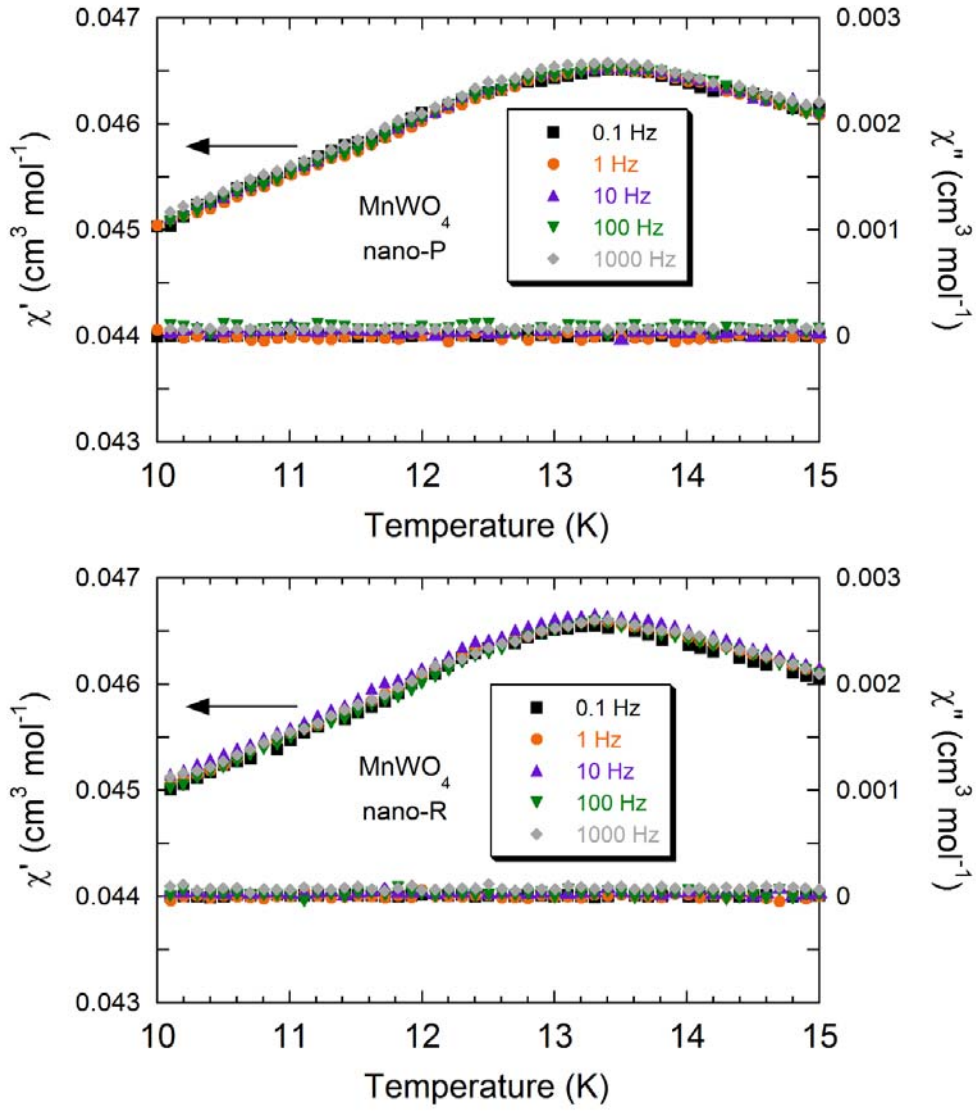

**Figure S3.** Temperature dependence of the in-phase,  $\chi'$  (left scale), and out-of-phase,  $\chi''$  (right scale), components of the AC susceptibility for nanostructured  $\text{MnWO}_4$  ceramics prepared by SPS at 520 °C and 450 MPa using nanopellets  $\text{MnWO}_4\text{-P}$  (upper graph) or nanorods  $\text{MnWO}_4\text{-R}$  (lower graph). Data were taken at zero DC magnetic field for driving frequencies in the range of 0.1 Hz – 1000 Hz. Amplitude of the driving field was  $H_{\text{AC}} = 3$  Oe.

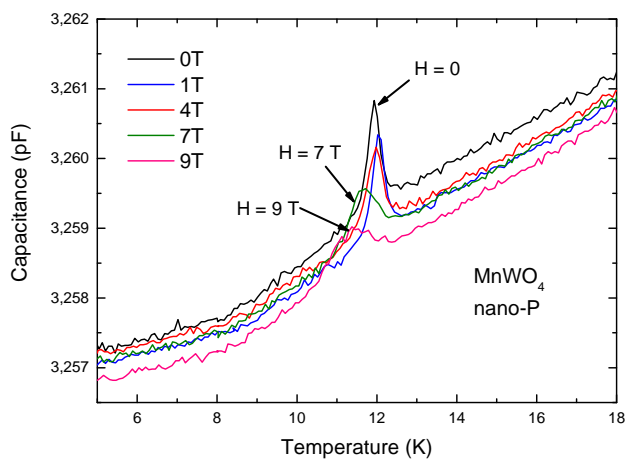

**Figure S4.** Temperature profiles of the dielectric capacitance at selected applied magnetic fields for nanostructured  $\text{MnWO}_4$  ceramics prepared by SPS at 520 °C and 450 MPa using nanopellets  $\text{MnWO}_4$ -P. Data were collected at 385 Hz.
